# Supplementary material for: Hypothalamic A11 Nuclei Regulate the Circadian Rhythm of the Mechanonociception and the Spinal Clock Gene Transcription through Dopamine Receptor Activation
Source: Preprints.org preprint supplement (doi:10.20944/preprints202009.0188.v1), 2020-09-08
Supplement: Supplementary file 1 [file supplementary]

**Supplementary figures**

**Supplementary Fig. 1.** Time course of the paw withdrawal threshold (g) in formalin-treated rats (n=8). All rats were evaluated every 4 hours for 24 hours. Rats maintained with light–dark cycles (12 h–12 h). Yellow and black bars represent the period of the day. The discontinuous line represents a sinusoid function. Data are presented as mean±SEM. *P<0.05, by non-parametric one-way repeated measures ANOVA (Friedman test) followed by Dunn’s test.

**Supplementary Fig. 2.** Effect of the administration of vehicle in the A11 nucleus on the paw withdrawal threshold (g). All rats were evaluated by 24 h each 4 h. Rats were evaluated every 4 hours for 24 hours. Rats maintained with light–dark cycles (12 h–12 h). Yellow and black bars represent the period of the day. Data are the mean±SEM of 13 (control) and 6 animals (Vehicle). No significant differences with control groups each hour (two-way ANOVA, followed by the Dunn’s test).

**Supplementary Fig. 3.** Effect of the intrathecal (IT) administration of 6-OHDA in the lumbar region of the spinal cord (L4-L5 vertebrae) and administration of 6-OHDA in A11 nucleus on the paw withdrawal threshold (PWT, g). PWT was evaluated after 15 days after the injection of 6-OHDA. All Rats were evaluated every 4 hours for 24 hours. Rats maintained with light–dark cycles (12 h–12 h). Yellow and black bars represent the period of the day. Data are the mean±SEM of 13 (control), 8 (IT lesion), and 5 (A11 lesion + IT lesion) animals. *P<0.05, by two-way ANOVA, followed by the Dunn’s test, compared with the control group each hour.

**Supplementary Fig. 4.** Effect of the intrathecal administration of vehicle in the lumbar region of the spinal cord (L4-L5 vertebrae) on the paw withdrawal threshold (g). Rats were evaluated every 4 hours for 24 hours. Rats maintained with light–dark cycles (12 h–12 h). Yellow and black bars represent the period of the day. Data are the mean ± SEM of 13 (control) and 6 animals (Vehicle). No significant differences with control groups each hour (two-way ANOVA, followed by the Dunn’s test).

**Supplementary Fig. 5.** Differential effects of the intrathecal injection of the dopaminergic receptor (DR) antagonists on circadian paw withdrawal threshold (g). Intrathecal administration of each DR antagonist separately injected. Rats were evaluated at 12:00 h. Rats were evaluated every 4 hours for 24 hours. Rats maintained with light–dark cycles (12 h–12 h). Data are the mean±SEM of 6 independents experiments. *P<0.05, by two-way ANOVA, followed by the Dunn’s test.
